# Supplementary material for: A novel sensor based on bifunctional monomer molecularly imprinted film at graphene modified glassy carbon electrode for detecting traces of moxifloxacin
Source: Royal Society of Chemistry journal article supplement (doi:10.1039/c6ra01494a), 2016-01-01
Supplement: c6ra01494a1.pdf [file c6ra01494a1.pdf]

## Supporting Information

for

**A novel sensor based on bifunctional monomers molecularly imprinted film at graphene modified glassy carbon electrode for detecting trace of moxifloxacin**

Zhiming Jiang, Guangyu Li, Mingxiao Zhang\*

*School of Chemistry and Chemical Engineering, Southwest University, Chong Qing 400715, PR China*

E-mail: [pclab@swu.edu.cn](mailto:pclab@swu.edu.cn)

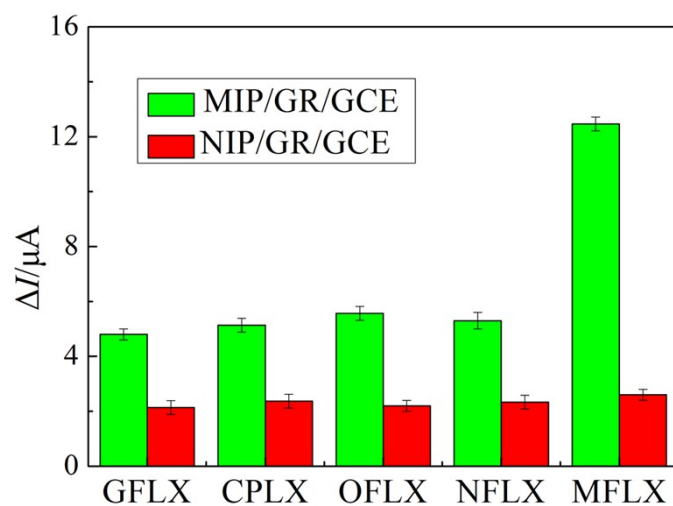

Fig. S1. Selective recognition of the MIP/GR/GCE and NIP/GR/GCE for moxifloxacin and its analogues after incubation for 10 min. The concentration of MFLX, NFLX, OFLX, CPLX, and GFLX was  $4.0 \times 10^{-9}$  M.

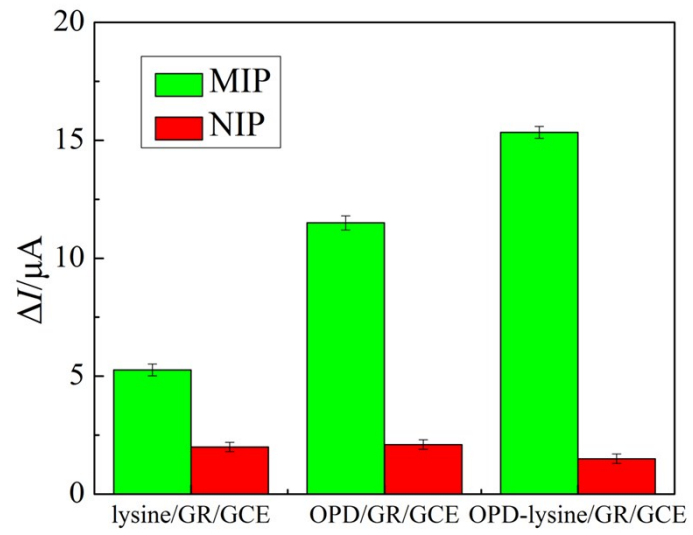

Fig. S2  $\Delta I$  of the sensors prepared using OPD, L-lysine, and OPD-lysine as polymerized monomer.

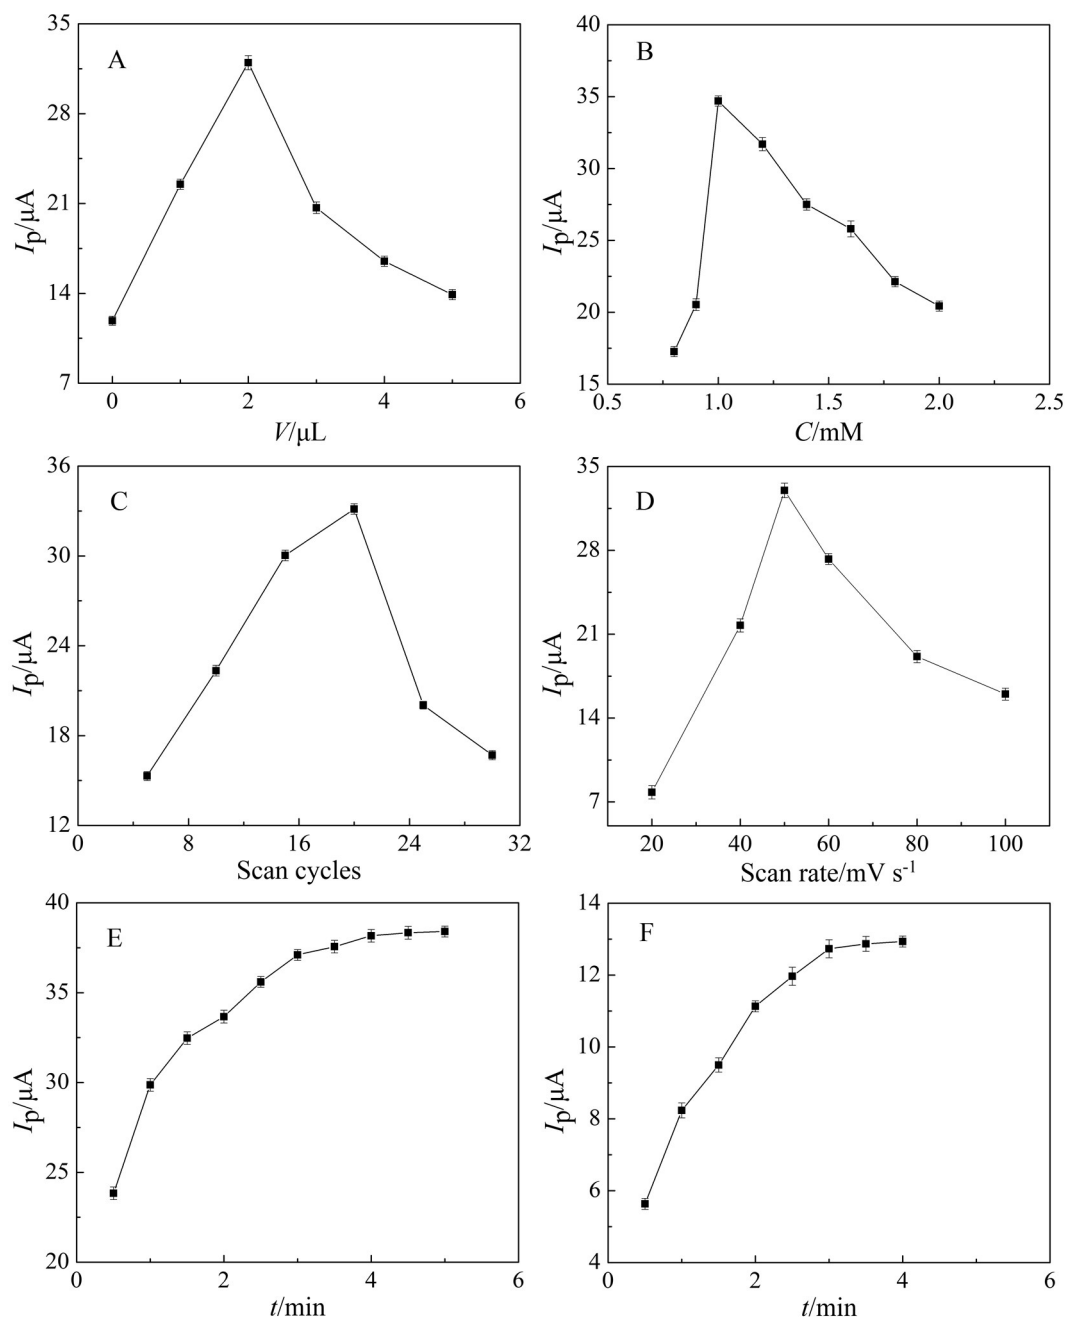

Fig. S3 Optimization of conditions for the preparation of MIP/GR/GCE. (A) the volume of graphene suspension; (B) the concentration of OPD and L-lysine; (C) scan cycles; (D) scan rates; (E) the elution curve of MIP/GR/GCE; (F) the elution curve of MIP/GCE.

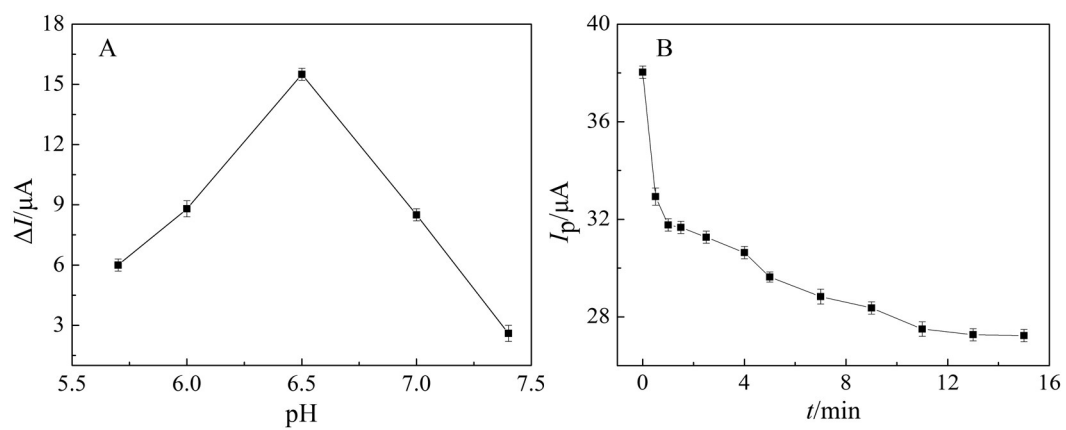

Fig. S4 (A) The pH effect of rebinding solution for MIP/GR/GCE; (B) the influence of incubation time on the response of the sensor.

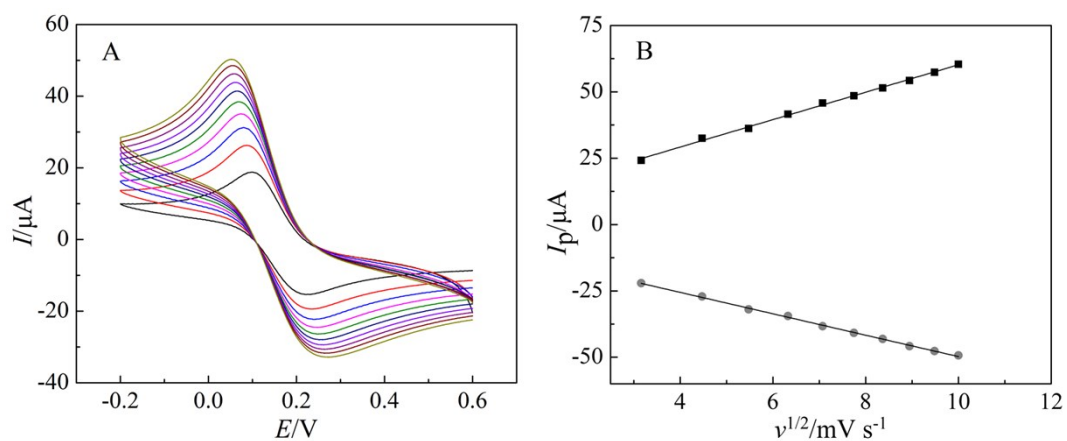

Fig. S5 (A) CV curves of MIP/GR/GCE at different scan rates (from inner to outer): 10, 20, 30, 40, 50, 60, 70, 80, 90, and 100  $\text{mV s}^{-1}$  in the 2.0 mM  $[\text{Fe}(\text{CN})_6]^{3-/4-}$  containing 0.10 M KCl. (B) The relationship between the scan rate ( $\nu$ ) and anodic ( $I_{pa}$ ), cathodic ( $I_{pc}$ ).

Table S1 Comparison of the performance of our proposed MIP/GR/GCE electrode with other published electrochemical methods for the detection of moxifloxacin.

| Electrode                 | Linear range (M)                          | Detection limit (M)    | Reference |
|---------------------------|-------------------------------------------|------------------------|-----------|
| GCE                       | $5.0 \times 10^{-6} - 1.5 \times 10^{-5}$ | $4.37 \times 10^{-7}$  | 13        |
| DNA/GCE                   | $2.0 \times 10^{-7} - 1.4 \times 10^{-6}$ | $8.0 \times 10^{-8}$   | 18        |
| PVC <sup>a</sup> membrane | $4.0 \times 10^{-6} - 1.0 \times 10^{-2}$ | $3.0 \times 10^{-6}$   | 17        |
| MIP/CPE <sup>b</sup>      | $3.1 \times 10^{-6} - 2.0 \times 10^{-4}$ | $5.9 \times 10^{-8}$   | 16        |
| MIP/GR/GCE                | $1.0 \times 10^{-9} - 5.0 \times 10^{-5}$ | $5.12 \times 10^{-10}$ | This work |

<sup>a</sup> PVC: Polyvinyl chloride.

<sup>b</sup> CPE: carbon paste electrode.

Table S2 Selectivity of MIP/GR/GCE sensor for  $4.0 \times 10^{-9}$  M MFLX and interferents.

| Substrate | $(\Delta I/I_0)_{\text{MIP}}$ (%) | $(\Delta I/I_0)_{\text{NIP}}$ (%) | $\alpha$ | $\beta$ |
|-----------|-----------------------------------|-----------------------------------|----------|---------|
| MFLX      | 37.4                              | 18.8                              | 2.0      | 1.0     |
| NFLX      | 14.1                              | 20.2                              | 0.70     | 2.8     |
| OFLX      | 13.8                              | 18.5                              | 0.74     | 2.7     |
| CPLX      | 12.9                              | 19.2                              | 0.67     | 3.0     |
| GFLX      | 13.3                              | 18.6                              | 0.71     | 2.8     |
